# Supplementary material
Source: publisher site journal article supplement (https://www.dovepress.com/get_supplementary_file.php?f=340950.docx)
Supplement: Supplementary file 1 [file get_supplementary_file.php]

For Table 1, data was included from studies with at least 2 ESS measurements, in English, in clinical settings, and separated by >7 days. Data was extracted by various methods. For Johns 1991, the presented data was extracted directly from the reported data and Cohen’s Kappa could not be calculated. For Nguyen et al. and Campbell et al., the data was taken from the reported data and extracted from the Bland-Altman plots using a web-based tool (https://automeris.io/WebPlotDigitizer/) after unsuccessful attempts to obtain the data directly from the authors. For Nguyen et al., all the data presented in Table 1 was extracted directly from the reported data except for Cohen’s Kappa. For calculation of Cohen’s Kappa, the Bland-Altman plot allowed for extraction of a complete set of data (n=142) since overlapping data points were clearly demonstrated. Numbers were rounded to the nearest 0.5. To ensure accuracy of the extracted information, we compared the mean and standard deviation from the extracted data to the mean and standard deviation reported in the paper. Nearly identical results were obtained with extraction. The reported mean±SD was 11.1±5.2 on the first ESS and 11.2±5.3 on the second ESS. For the extracted data, the mean±SD was 11.1±5.26 on the first ESS and 11.2±5.33 on the second ESS. For Campbell et al., the correlation coefficient was calculated by taking the square root of the reported coefficient of determination. For the determination of Cohen’s Kappa, a combination of data reported in the text and extraction of the data from the Bland-Altman plot was used. Due to overlapping data points, only 112 data points could be extracted from the reported n of 154. From the data available, only a range of values for Cohen’s Kappa could be calculated. For Taylor et al. and Walker et al., the raw data was available and direct calculations were made. Of note, for Taylor et al., there were up to 3 separate ESS scores per patient. For this analysis, the comparisons were treated as 2 separate groups: ESS at oximetry vs. ESS at general practitioner and ESS at oximetry vs. ESS at specialist. The values presented for each category reflect only those for which complete data was available; therefore, due to this methodologic issue the values presented here differ slightly from those reported in the original manuscript.
